1 **COVID-19 outcomes associated with clinical and demographic characteristics in patients**  
2 **hospitalized with severe and critical disease in Peshawar**

3 Muhammad Imran<sup>1</sup>, Azharuddin<sup>1</sup>, Muhammad Yousaf<sup>2</sup>, Sajjad Khan<sup>3</sup>, Abdul Jalil Khan<sup>4</sup>, Zafar  
4 Iqbal<sup>1\*</sup>, RahmanUllah Jan<sup>2</sup>, Shahid Khan<sup>5</sup> Muhammad Salman Khan<sup>6</sup>

5 <sup>1</sup>MTI, Lady Reading Hospital, Peshawar, Pakistan

6 <sup>2</sup>COVID-19 Hospital, Nishterabad, Peshawar, Pakistan

7 <sup>3</sup>Indiana University (IU) School of Public Health, IU, Bloomington, USA

8 <sup>4</sup>Khyber Medical University, Peshawar, Pakistan

9 <sup>5</sup>Health Sector Reforms Unit, Health Secretariat, Peshawar, Pakistan

10 <sup>6</sup>Northwest General Hospital and Research Center, Peshawar, Pakistan

11 **Short title:** COVID-19 outcomes associated with clinical and demographic characteristics

12 **\*Corresponding Author**

13 Dr Zafar Iqbal (MBBS, FCPS)

14 Assistant Professor, Pulmonology

15 Lady Reading Hospital, Peshawar

16 25000, Pakistan.

17 E-mail: [drzafariqbalpulmo@gmail.com](mailto:drzafariqbalpulmo@gmail.com) (ZI)

18

## 19 **Abstract**

20 **Background:** As a novel disease, understanding the relationship between the clinical and  
21 demographic characteristics of coronavirus disease 2019 (COVID-19) patients and their outcome  
22 is critical. We investigated this relationship in hospitalized patients in a tertiary healthcare  
23 setting.

24 **Aims/objectives:** To study COVID-19 severity and outcomes in relation to clinical and  
25 demographic characteristics of in admitted patients

26 **Methodology:** In this cross-sectional study, medical records for 1087 COVID-19 patients were  
27 reviewed to extract symptoms, comorbidities, demographic characteristics, and outcomes data.  
28 Statistical analyses included the post-stratification chi-square test, independent sample t-test,  
29 multivariate logistic regression, and time-to-event analysis.

30 **Results:** The majority of the study participants were >50 years old (67%) and male (59%) and  
31 had the following symptoms: fever (96%), cough (95%), shortness of breath (73%), loss of taste  
32 (77%), and loss of smell (77%). Regarding worst outcome, multivariate regression analysis  
33 showed that these characteristics were statistically significant: shortness of breath (adjusted odds  
34 ratio [aOR] 31.3; 95% CI, 11.87–82.53;  $p < 0.001$ ), intensive care unit (ICU) admission (aOR  
35 28.3; 95% CI, 9.0–89.6;  $p < 0.001$ ), diabetes mellitus (aOR 5.1; 95% CI, 3.2–8.2;  $p < 0.001$ ),  
36 ischemic heart disease (aOR 3.4; 95% CI, 1.6–7;  $p = 0.001$ ), nausea and vomiting (aOR 3.3; 95%  
37 CI, 1.7–6.6;  $p = 0.001$ ), and prolonged hospital stay (aOR 1.04; 95% CI, 1.02–1.08;  $p = 0.001$ ),  
38 while patients with rhinorrhea were significantly protected (aOR 0.3; 95% CI, 0.2–0.5;  $p <$

39 0.001). A Kaplan–Meier curve showed that the symptoms of shortness of breath, ICU admission,  
40 fever, nausea and vomiting, and diarrhea increased the risk of mortality.

41 **Conclusion:** Increasing age, certain comorbidities and symptoms, and direct admission to the  
42 ICU increased the risk of worse outcomes. Further research is needed to determine risk factors  
43 that may increase disease severity and devise a proper risk-scoring system to initiate timely  
44 management.

45

46 **Keywords:** COVID-19, SARS-CoV-2, clinico-demographic characteristics, mortality, outcomes

47

48

49

## 50 **Introduction**

51 Severe acute respiratory syndrome coronavirus 2 (SARS-CoV-2) is the cause of coronavirus  
52 disease 2019 (COVID-19), a member of the coronavirus family that was responsible for the 2003  
53 SARS epidemic [1]. The World Health Organization (WHO) declared the outbreak to be a Public  
54 Health Emergency of International Concern on January 30, 2020, and declared it to be a global  
55 pandemic on March 11, 2020 [2]. The virus has affected almost every country, every nation, and  
56 all races worldwide. The WHO has reported 269.2 million confirmed cases of COVID-19 and  
57 5.30 million deaths internationally as of December 10, 2021 [3]. Although 8.42 billion vaccine  
58 doses were administered worldwide by December 10, only a little more than 64 million doses  
59 have been administered in low-income countries [3]. With the emergence of the Omicron  
60 variant, the disease is surging again in various parts of the world, thereby posing a challenge to  
61 vaccination measures [3]. At the time of this writing, the total number of COVID-19 infections  
62 in Pakistan is 1.28 million, with slightly less than 30,000 deaths [4]. Although the vaccination  
63 drive was initially slow in Pakistan, its pace is quickening. As of December 8, 2021, 130 million  
64 vaccine doses have been administered throughout Pakistan, whereas only 54 million people have  
65 been fully vaccinated, defined as having either completed the single-dose vaccine or both doses  
66 of the two-dose vaccine [4].

67 The clinical presentation of COVID-19 is variable [5]. It ranges from asymptomatic infection or  
68 mild upper respiratory symptoms in most cases to severe viral pneumonia with respiratory failure  
69 [6]. In most infected individuals, no symptoms or only minimal symptoms appear [7].  
70 Symptomatic patients present with variable symptoms. The most common are fever, cough,  
71 generalized body aches, shortness of breath, anosmia, and loss of taste. The uncommon

72 symptoms are headache, nausea, and diarrhea [6]. Fever is the most prevalent reported symptom  
73 [8]. Continuous fever, shortness of breath, and presence of respiratory and gastrointestinal  
74 symptoms make a patient prone to develop severe disease. Moreover, the likelihood of intensive  
75 care unit (ICU) admission, mechanical ventilation (invasive and non-invasive), and death is high  
76 in such patients. In a study by Rongchen [9] et al., gastrointestinal symptoms were more strongly  
77 linked with worse outcomes. In Nigeria, Akin Abayomi [10] et al. found that cough, high-grade  
78 fever, and shortness of breath were the most common presenting symptoms. Symptom severity  
79 was the most important predictor of death. Among all other symptoms, shortness of breath had a  
80 worse prognostic value in terms of mortality. In contrast, isolated loss of the sense of smell and  
81 sense of taste was not linked with the development of critical disease and thus had good  
82 prognostic value.

83 Significant risk factors associated with worse outcomes are chronic illness, older age, and  
84 genetic predisposition [11]. In a study by Elizabeth [12] et al., older age was the most significant  
85 risk factor for death, followed by hematologic malignancies, immunosuppressive drugs, organ  
86 transplantation, uncontrolled diabetes mellitus, black race, and obesity. A study from Pakistan by  
87 Ambreen Chaudhry [13] et al. found that the risk factors responsible for worse outcomes, defined  
88 as ICU admission, invasive mechanical ventilation (IMV), and death, were older age and the  
89 presence of comorbidities.

90 Several studies have reported different mortality rates for patients admitted to different hospital  
91 departments, such as the ICU, high-dependency unit, and general ward. Mortality is highest for  
92 patients receiving IMV, followed by those managed with continuous positive airway  
93 pressure/non-invasive ventilation, high-flow nasal cannula, and oxygen administered via other

94 devices such as a simple face mask and nasal prongs [14]. The outcomes are good for patients  
95 who do not require supplemental oxygen and hospital admission [15].

96 The objective of the current study is to understand the demographic and clinical characteristics of  
97 patients with COVID-19 and the associated severity of illness and outcomes. We sought to  
98 perform an in-depth analysis of the various factors related to mortality, morbidity, and recovery  
99 from COVID-19. In Pakistan, data are very limited on the clinical and demographic  
100 characteristics of patients with COVID-19. Therefore, the results of this study will help us tailor  
101 our management and preparedness response to the COVID-19 pandemic.

102 This article was previously presented as an abstract at the 14th Biennial Chest Conference  
103 arranged by the Pakistan Chest Society at Karachi, Pakistan, on 4 December, 2021.

104

105

## 106 **Material and Methods**

107 This cross-sectional study was conducted from July 15, 2020, to July 3, 2021 in Peshawar,  
108 Khyber Pakhtunkhwa, Pakistan. All patients admitted to the study hospital were included in our  
109 study. Patients who were referred to another hospital or left without medical advice were  
110 excluded from our study. Informed written consent was obtained from all patients at admission  
111 to the hospital. The analysis was performed using SPSS, version 25 (IBM, Armonk, NY, USA)  
112 [16]

113 The association of various characteristics with mortality was analyzed. We used the post-  
114 stratification chi-square test and independent sample t-test to check the statistical significance of  
115 qualitative and quantitative characteristics, respectively. A value of  $p \leq 0.05$  was considered  
116 statistically significant. To assess the adjusted association, we used multivariate logistic  
117 regression, with mortality as a dependent variable. These predictor variables were included in the  
118 final multivariate regression model, with a value of  $p \leq 0.25$  on the univariate model as the  
119 dependent variable. In the final multivariate model, a value of  $p \leq 0.05$  was considered  
120 significant. Time-to-event analysis was conducted to check for the difference in mortality across  
121 various groups.

## 122 Results

123 This study assessed a total of 1087 patients, of whom 449 (41%) were female and 731 (67%)  
124 were older than 50 years (Table 1). Most had a fever (96.4%), cough (95.3%), shortness of  
125 breath (72.7%), loss of taste (76.6%), and loss of smell (76.5%). Patients presented relatively less  
126 commonly with headache (28.1%), rhinorrhea (32.8%), nausea and vomiting (12.8%), and  
127 diarrhea (12.1%). Among comorbid conditions, hypertension (29.7%) and diabetes mellitus  
128 (24.4%) were more common compared with ischemic heart disease (9%) and end-stage renal  
129 disease (1.3%). The average length of hospital stay was 8.33 days. The overall mortality rate was  
130 24.4% (268 patients) and was highest among those admitted directly to the ICU (49 of 56  
131 patients, 88%) versus those admitted directly to the high-dependency unit (210 of 546 patients,  
132 38%) and the general ward (9 of 485, 1.8%).

133 Table 1. Frequency of various characteristics of study participants (n = 1087).

| Characteristics            | No.            | %    |     |
|----------------------------|----------------|------|-----|
| <b>Age</b>                 |                |      |     |
|                            | Below 50 years | 356  | 33% |
|                            | Above 50 years | 731  | 67% |
| <b>Gender</b>              |                |      |     |
|                            | Female         | 449  | 41% |
|                            | Male           | 638  | 59% |
| <b>Fever</b>               |                |      |     |
|                            | No             | 39   | 4%  |
|                            | Yes            | 1048 | 96% |
| <b>Cough</b>               |                |      |     |
|                            | No             | 51   | 5%  |
|                            | Yes            | 1036 | 95% |
| <b>Headache</b>            |                |      |     |
|                            | No             | 782  | 72% |
|                            | Yes            | 305  | 28% |
| <b>Shortness of Breath</b> |                |      |     |
|                            | No             | 297  | 27% |
|                            | Yes            | 790  | 73% |
| <b>Rhinorrhoea</b>         |                |      |     |



|                                |                      |             |     |
|--------------------------------|----------------------|-------------|-----|
|                                | No                   | 730         | 67% |
|                                | Yes                  | 357         | 33% |
| <b>Loss of taste</b>           |                      |             |     |
|                                | No                   | 254         | 23% |
|                                | Yes                  | 833         | 77% |
| <b>Diarrhea</b>                |                      |             |     |
|                                | No                   | 955         | 88% |
|                                | Yes                  | 132         | 12% |
| <b>Nausea and Vomiting</b>     |                      |             |     |
|                                | No                   | 948         | 87% |
|                                | Yes                  | 139         | 13% |
| <b>Loss of Smell</b>           |                      |             |     |
|                                | No                   | 255         | 23% |
|                                | Yes                  | 831         | 77% |
| <b>Diabetes Mellitus</b>       |                      |             |     |
|                                | No                   | 822         | 76% |
|                                | Yes                  | 265         | 24% |
| <b>Hypertension</b>            |                      |             |     |
|                                | No                   | 764         | 70% |
|                                | Yes                  | 323         | 30% |
| <b>Ischemic Heart Disease</b>  |                      |             |     |
|                                | No                   | 989         | 91% |
|                                | Yes                  | 98          | 9%  |
| <b>End-Stage Renal Disease</b> |                      |             |     |
|                                | No                   | 1073        | 99% |
|                                | Yes                  | 14          | 1%  |
| <b>Days of Hospitalization</b> |                      |             |     |
|                                | mean (SD)            | 8.33 (7.94) |     |
| <b>Severity Level</b>          |                      |             |     |
|                                | Moderate             | 146         | 13% |
|                                | Severe               | 941         | 87% |
| <b>Unit of Admission</b>       |                      |             |     |
|                                | HDU / Isolation ward | 1031        | 95% |
|                                | ICU                  | 56          | 5%  |
| <b>Mortality</b>               |                      |             |     |
|                                | Recovered            | 819         | 63% |
|                                | Died                 | 268         | 24% |

134

135 Simple stratification (Table 2) showed that mortality was significantly higher in patients older  
 136 than 50 years (37% vs. 11%) and in those with shortness of breath (41% vs. 2%), diarrhea (60%

137 vs. 24%), nausea and vomiting (60% vs. 23%), diabetes mellitus (62% vs. 16%), hypertension  
 138 (53% vs. 18%), ischemic heart disease (74% vs. 24%), high level of disease severity (33% vs.  
 139 0%), and ICU admission (92% vs. 25%). Although mortality was also higher in female patients  
 140 (31% vs. 27%) and in those with fever (29% vs. 16%), and end-stage renal disease (100% vs.  
 141 28%), the association was not statistically significant. Some characteristics showed a statistically  
 142 significant protective effect from mortality, such as rhinorrhea (12% vs. 37%), loss of taste (2%  
 143 vs. 100%), and loss of smell (2% vs. 100%). Length of stay was also significantly higher in  
 144 patients who died compared with those who survived (11.43 vs. 7.63 days).

145

146 **Table 2. Association of various characteristics with mortality.**

| Characteristics |                | Mortality |     |           |     | *p-value |
|-----------------|----------------|-----------|-----|-----------|-----|----------|
|                 |                | Died      |     | Recovered |     |          |
|                 |                | No.       | %   | No.       | %   |          |
| <b>Age</b>      |                |           |     |           |     |          |
|                 | Below 50 years | 35        | 11% | 277       | 89% | < 0.001  |
|                 | Above 50 years | 233       | 37% | 394       | 63% |          |
| <b>Gender</b>   |                |           |     |           |     |          |
|                 | Female         | 118       | 31% | 266       | 69% | 0.217    |
|                 | Male           | 150       | 27% | 405       | 73% |          |
| <b>Fever</b>    |                |           |     |           |     |          |
|                 | No             | 6         | 16% | 31        | 84% | 0.090    |
|                 | Yes            | 262       | 29% | 640       | 71% |          |

|                            |     |     |      |     |     |         |
|----------------------------|-----|-----|------|-----|-----|---------|
| <b>Cough</b>               |     |     |      |     |     |         |
|                            | No  | 16  | 32%  | 34  | 68% | 0.578   |
|                            | Yes | 252 | 28%  | 637 | 72% |         |
| <b>Headache</b>            |     |     |      |     |     |         |
|                            | No  | 197 | 29%  | 480 | 71% | 0.543   |
|                            | Yes | 71  | 27%  | 191 | 73% |         |
| <b>Shortness of Breath</b> |     |     |      |     |     |         |
|                            | No  | 5   | 2%   | 290 | 98% | < 0.001 |
|                            | Yes | 263 | 41%  | 381 | 59% |         |
| <b>Rhinorrhea</b>          |     |     |      |     |     |         |
|                            | No  | 232 | 37%  | 394 | 63% | < 0.001 |
|                            | Yes | 36  | 12%  | 277 | 88% |         |
| <b>Loss of taste</b>       |     |     |      |     |     |         |
|                            | No  | 254 | 100% | 0   | 0%  | < 0.001 |
|                            | Yes | 14  | 2%   | 671 | 98% |         |
| <b>Diarrhea</b>            |     |     |      |     |     |         |
|                            | No  | 191 | 24%  | 620 | 76% | < 0.001 |
|                            | Yes | 77  | 60%  | 51  | 40% |         |
| <b>Nausea and Vomiting</b> |     |     |      |     |     |         |
|                            | No  | 186 | 23%  | 617 | 77% | < 0.001 |
|                            | Yes | 82  | 60%  | 54  | 40% |         |
| <b>Loss of Smell</b>       |     |     |      |     |     |         |

|                                     |                      |               |      |             |      |                      |
|-------------------------------------|----------------------|---------------|------|-------------|------|----------------------|
|                                     | No                   | 255           | 100% | 0           | 0%   | < 0.001              |
|                                     | Yes                  | 12            | 2%   | 671         | 98%  |                      |
| <b>Diabetes Mellitus</b>            |                      |               |      |             |      |                      |
|                                     | No                   | 113           | 16%  | 577         | 84%  | < 0.001              |
|                                     | Yes                  | 155           | 62%  | 94          | 38%  |                      |
| <b>Hypertension</b>                 |                      |               |      |             |      |                      |
|                                     | No                   | 116           | 18%  | 535         | 82%  | < 0.001              |
|                                     | Yes                  | 152           | 53%  | 136         | 47%  |                      |
| <b>Ischemic Heart Disease</b>       |                      |               |      |             |      |                      |
|                                     | No                   | 201           | 24%  | 647         | 76%  | < 0.001              |
|                                     | Yes                  | 67            | 74%  | 24          | 26%  |                      |
| <b>End-Stage Renal Disease</b>      |                      |               |      |             |      |                      |
|                                     | No                   | 264           | 28%  | 671         | 72%  | -                    |
|                                     | Yes                  | 4             | 100% | 0           | 0%   |                      |
| <b>Days of Hospitalization</b>      |                      |               |      |             |      |                      |
|                                     | mean (SD)            | 11.43 (10.28) |      | 7.63 (6.64) |      | < 0.001 <sup>a</sup> |
| <b>Severity Level</b>               |                      |               |      |             |      |                      |
|                                     | Moderate             | 0             | 0%   | 136         | 100% | < 0.001              |
|                                     | Severe               | 268           | 33%  | 535         | 67%  |                      |
| <b>Unit of Admission at Arrival</b> |                      |               |      |             |      |                      |
|                                     | HDU / isolation ward | 219           | 25%  | 667         | 75%  | < 0.001              |

|  |     |    |     |   |    |  |
|--|-----|----|-----|---|----|--|
|  | ICU | 49 | 92% | 4 | 8% |  |
|--|-----|----|-----|---|----|--|

147 \* p-value represents results of chi-square test

148 <sup>a</sup> p-value represents results of independent samples t-test

149

150 On multivariate regression (Table 3), several characteristics were statistically significant, as  
 151 follows: shortness of breath (adjusted odds ratio [aOR] 31.3; 95% CI, 11.87–82.53;  $p < 0.001$ ),  
 152 ICU admission (aOR 28.3; 95% CI, 9.0–89.6;  $p < 0.001$ ), diabetes mellitus (aOR 5.1; 95% CI,  
 153 3.2–8.2;  $p < 0.001$ ), ischemic heart disease (aOR 3.4; 95% CI, 1.6–7;  $p = 0.001$ ), nausea and  
 154 vomiting (aOR 3.3; 95% CI, 1.7–6.6;  $p = 0.001$ ) and prolonged hospital stay (aOR 1.04; 95% CI,  
 155 1.02–1.08;  $p = 0.001$ ). These findings that the odds of shortness of breath was 31.3 times, ICU  
 156 admission was 28.3 times, diabetes mellitus was 5.1 times, ischemic heart disease was 3.4 times,  
 157 nausea and vomiting was 3.3 times, and prolonged hospital stay was four times higher in patients  
 158 who died compared with those who survived. Patients with rhinorrhea were significantly  
 159 protected on a multivariate model (aOR 0.3; 95% CI, 0.2–0.5;  $p < 0.001$ ).

160

161

162 **Table 3. Multivariate logistic regression analysis of various characteristics.**

| Characteristics |        | aOR <sup>a</sup> | 95% CIs |       | p-value |
|-----------------|--------|------------------|---------|-------|---------|
|                 |        |                  | Lower   | Upper |         |
| <b>Gender</b>   |        |                  |         |       |         |
|                 | Female | Ref              |         |       |         |

|                                |      |        |        |        |         |
|--------------------------------|------|--------|--------|--------|---------|
|                                | Male | 0.725  | 0.483  | 1.086  | 0.119   |
| <b>*Fever</b>                  |      |        |        |        |         |
|                                | No   | Ref    |        |        |         |
|                                | Yes  | 5.526  | 1.442  | 21.174 | 0.013   |
| <b>*Shortness of Breath</b>    |      |        |        |        |         |
|                                | No   | Ref    |        |        |         |
|                                | Yes  | 31.302 | 11.873 | 82.525 | < 0.001 |
| <b>*Rhinorrhea</b>             |      |        |        |        |         |
|                                | No   | Ref    |        |        |         |
|                                | Yes  | 0.302  | 0.183  | 0.500  | < 0.001 |
| <b>Diarrhea</b>                |      |        |        |        |         |
|                                | No   | Ref    |        |        |         |
|                                | Yes  | 1.262  | 0.633  | 2.515  | 0.509   |
| <b>*Nausea and Vomiting</b>    |      |        |        |        |         |
|                                | No   | Ref    |        |        |         |
|                                | Yes  | 3.347  | 1.688  | 6.639  | 0.001   |
| <b>*Diabetes Mellitus</b>      |      |        |        |        |         |
|                                | No   | Ref    |        |        |         |
|                                | Yes  | 5.079  | 3.153  | 8.179  | < 0.001 |
| <b>Hypertension</b>            |      |        |        |        |         |
|                                | No   | Ref    |        |        |         |
|                                | Yes  | 1.546  | 0.963  | 2.481  | 0.071   |
| <b>*Ischemic Heart Disease</b> |      |        |        |        |         |

|  |                                 |        |       |        |         |
|--|---------------------------------|--------|-------|--------|---------|
|  | No                              | Ref    |       |        |         |
|  | Yes                             | 3.369  | 1.628 | 6.969  | 0.001   |
|  |                                 |        |       |        |         |
|  | <b>*Days of Hospitalization</b> | 1.048  | 1.020 | 1.077  | 0.001   |
|  |                                 |        |       |        |         |
|  | <b>*Unit of Admission</b>       |        |       |        |         |
|  | HDU /<br>Isolation ward         | Ref    |       |        |         |
|  | ICU                             | 28.330 | 8.955 | 89.631 | < 0.001 |

163 \* p-value represents results of chi-square test

164 <sup>a</sup> p-value represents results of independent samples t-test

165

166 The survival analysis comprised 1087 patients. Our analysis observed a cumulated total risk time  
 167 of 9184 days. The Kaplan–Meier survival plots for the sociodemographic and medical factors  
 168 that were statistically significant are presented in Figure 1. As can be inferred from the plots,  
 169 patients with fever (Fig 1A), shortness of breath (Fig 1B), ischemic heart disease (Fig 1C),  
 170 nausea and vomiting (Fig 1D), diabetes mellitus (Fig 1E), and ICU admission (Fig 1F) were  
 171 more likely to die compared with patients who did not have these signs and symptoms.

172 **Fig 1 Title: K-M Curves for various characteristics**

173 **Fig 1 Legend:** As shown, patients with fever (A), shortness of breath (B), ischemic heart disease  
 174 (C), nausea and vomiting (D), diarrhea (E), and ICU admission (F) were more likely to encounter  
 175 the worst outcome as compared with patients who did not have these characteristics.

176

## 177 **Discussion**

178 The severity of any given disease depends on the population's demographic and clinical  
179 characteristics [17]. Therefore, we aimed to study these factors to understand COVID-19 in  
180 detail. This study will help us improve the management steps to prevent severe disease  
181 outcomes. Clinicians and scientists are performing many kinds of studies to understand this  
182 novel disease, which has killed millions of people. Many studies have already been conducted,  
183 but with several drawbacks, such as a small sample size. Although this current investigation is a  
184 single-site study, the hospital is an ideal location to examine the COVID-19 cohort because it  
185 serves as a referral center for most of the province. This study included 1087 patients with  
186 COVID-19 from a single tertiary care institution. Our hospital had an overall mortality rate of  
187 24%, which is comparable with that of most nearby tertiary care hospitals. In a multi-center  
188 study conducted by Zia Ul Haq [18] et al. in Peshawar, Pakistan, the inpatient mortality rate in a  
189 cohort of 179 patients was 29.1%.

190 The findings show that certain clinical and demographic factors may predispose patients to  
191 worse outcomes. Severe shortness of breath (OR 31) and admission to the ICU on presentation  
192 (OR 28), for example, were the strongest predictors of worse outcomes in our analysis, in favor  
193 of mortality. Direct admission to the ICU indicates that the patient's condition is rapidly  
194 deteriorating or that the patient arrived at the hospital very late and in critical condition.  
195 Furthermore, symptoms such as nausea and vomiting (OR 3.9), fever (OR 3.5), and diarrhea,  
196 (OR 1.52) predispose one to worse outcomes as well. In contrast, our study found that rhinorrhea  
197 indicated a higher likelihood of recovery, which has not been reported previously. In a survey by



198 Nausheen Nasir [19] et al. in Karachi, Pakistan, disease severity was associated with age older  
199 than 60 years (OR 1.92) and having shortness of breath (OR 4.43). In another study, Darbaz A  
200 [20] et al. in the United States found that patients presenting with gastrointestinal symptoms had  
201 higher hospitalization rates, ICU admission, and intubation. In contrast, Preethi Ramachandran  
202 [21] et al. compared the outcomes in two groups of patients with or without gastrointestinal  
203 symptoms and discovered that mortality did not differ between cases and controls (41.9% vs.  
204 37.8%;  $p = 0.68$ ). Secondary outcomes, such as length of stay (7.8 vs. 7.9 days;  $p = 0.87$ ) and  
205 need for mechanical ventilation (29% vs. 26.9%;  $p = 0.82$ ), also showed no statistically  
206 significant differences.

207 Many studies have found that the presence of comorbidities such as diabetes, hypertension,  
208 ischemic heart disease, and end-stage renal disease increases the severity of the disease [22, 23].  
209 In our research, we came to a similar conclusion. According to the survival analysis in our study,  
210 patients with diabetes mellitus, hypertension, and ischemic heart disease had a lower chance of  
211 survival when admitted to the hospital with COVID-19 than patients without any of these  
212 comorbidities. Due to the small sample size, the findings could not be statistically tested because  
213 most patients who developed end-stage renal disease in our study were referred to other hospitals  
214 with dialysis services. Other authors have reported similar results. Naila Shoaib [24] et al. in  
215 Pakistan discovered a link between the severity of COVID-19 and the number and type of  
216 comorbidities. As the number of comorbidities increased, so did the disease severity. Patients  
217 who were older, had diabetes, or had high blood pressure were more likely to have a poor  
218 outcome.

219 Our study was conducted at a tertiary care hospital with a large sample size for one hospital. The  
220 study sample was diverse because the patients were referred from throughout the province to this  
221 tertiary care hospital. We evaluated both demographic and clinical characteristics to perform an  
222 in-depth analysis.

223 The limitations of this study are that we did not include patients from other hospitals for  
224 comparative analysis. Furthermore, we did not include the response to various treatments, and  
225 lastly, the patient's social characteristics, such as local residence, occupation, and income, were  
226 not included in this analysis.

227 Further research is needed to develop a comprehensive scoring system for COVID-19. The  
228 system for scoring should be practical and straightforward to predict the disease severity and the  
229 management steps for COVID-19. Both prospective and retrospective analyses from the global  
230 north and the global south are needed to identify the critical factors in managing this disease.

231

## 232 **Conclusions**

233 Our findings showed that older age, comorbidities, and direct admission to the ICU increase the  
234 risk of worse outcomes. Furthermore, shortness of breath, fever, and gastrointestinal symptoms  
235 also increase the risk of worse outcomes. In contrast, patients with isolated upper respiratory  
236 symptoms have a lower mortality rate. More research is needed to determine risk factors that  
237 increase the risk of disease severity and to devise a proper risk scoring system to initiate timely  
238 management.

239

240 Acknowledgments:

241 **Ethical Approval:** Ethical approval for the study was taken from Ethics Committee, Office of

242 Research Innovation & Commercialization (ORIC), Khyber Medical University, Peshawar,

243 bearing number DIR/KMU-EB/DO000667.

244 Informed written consent was taken from all the participants.

245 **References:**

- 246 1. Zheng J. SARS-CoV-2: An emerging coronavirus that causes a global threat. *Int J Biol*  
247 *Sci.* 2020;16(10): 1678-1685. doi: [10.7150/ijbs.45053](https://doi.org/10.7150/ijbs.45053).
- 248 2. Detail. Who.int. 2020 [cited Dec 13, 2021]. Available from:  
249 [https://www.who.int/director-general/speeches/detail/who-director-general-s-opening-remarks-](https://www.who.int/director-general/speeches/detail/who-director-general-s-opening-remarks-at-the-media-briefing-on-covid-19---11-march-2020)  
250 [at-the-media-briefing-on-covid-19---11-march-2020](https://www.who.int/director-general/speeches/detail/who-director-general-s-opening-remarks-at-the-media-briefing-on-covid-19---11-march-2020).
- 251 3. Mathieu E, Ritchie H, Ortiz-Ospina E, Roser M, Hasell J. Coronavirus pandemic  
252 (COVID-19). Our World Data. 2020 [cited Dec 14, 2021]. Available from:  
253 <https://ourworldindata.org/covid-cases>.
- 254 4. National command operation center: national command operation center. 2021 [cited Dec  
255 13, 2021]. Available from: <https://ncoc.gov.pk/covid-vaccination-en.php>.
- 256 5. da Rosa Mesquita R, Francelino Silva Junior LC, Santos Santana FM, Farias de Oliveira  
257 T, Campos Alcântara R, et al. Clinical manifestations of COVID-19 in the general population:  
258 systematic review. *Wien Klin Wochenschr.* 2021;133(7-8): 377-382. doi: [10.1007/s00508-020-](https://doi.org/10.1007/s00508-020-01760-4)  
259 [01760-4](https://doi.org/10.1007/s00508-020-01760-4).
- 260 6. Vihta KD, Pouwels KB, Peto T, Pritchard E, Eyre DW, House T, et al. Symptoms and  
261 SARS-CoV-2 positivity in the general population in the UK. *Clin Infect Dis.* 2021. doi:  
262 [10.1093/cid/ciab945](https://doi.org/10.1093/cid/ciab945).
- 263 7. Alene M, Yismaw L, Assemie MA, Ketema DB, Mengist B, Kassie B, et al. Magnitude  
264 of asymptomatic COVID-19 cases throughout the course of infection: A systematic review and  
265 meta-analysis. *PLOS ONE.* 2021;16(3): e0249090. doi: [10.1371/journal.pone.0249090](https://doi.org/10.1371/journal.pone.0249090).

- 266 8. Islam MA, Kundu S, Alam SS, Hossan T, Kamal MA, Hassan R. Prevalence and  
267 characteristics of fever in adult and paediatric patients with coronavirus disease 2019 (COVID-  
268 19): A systematic review and meta-analysis of 17515 patients. PLOS ONE. 2021;16(4):  
269 e0249788. doi: [10.1371/journal.pone.0249788](https://doi.org/10.1371/journal.pone.0249788).
- 270 9. Chen R, Yu YL, Li W, Liu Y, Lu JX, Chen F, et al. Gastrointestinal symptoms associated  
271 with unfavorable prognosis of COVID-19 patients: A retrospective study. Front Med (Lausanne).  
272 2020;7: 608259. doi: [10.3389/fmed.2020.608259](https://doi.org/10.3389/fmed.2020.608259).
- 273 10. Talavera B, García-Azorín D, Martínez-Pías E, Trigo J, Hernández-Pérez I, Valle-  
274 Peñacoba G, et al. Anosmia is associated with lower in-hospital mortality in COVID-19.  
275 J Neurol Sci. 2020;419: 117163. doi: [10.1016/j.jns.2020.117163](https://doi.org/10.1016/j.jns.2020.117163).
- 276 11. Liu X, Yue X, Liu F, Wei L, Chu Y, Bao H, et al. Analysis of clinical features and early  
277 warning signs in patients with severe COVID-19: A retrospective cohort study. PLOS ONE.  
278 2020;15(6): e0235459. doi: [10.1371/journal.pone.0235459](https://doi.org/10.1371/journal.pone.0235459).
- 279 12. Williamson EJ, Walker AJ, Bhaskaran K, Bacon S, Bates C, Morton CE, et al. Factors  
280 associated with COVID-19-related death using OpenSAFELY. Nature. 2020;584(7821): 430-  
281 436. doi: [10.1038/s41586-020-2521-4](https://doi.org/10.1038/s41586-020-2521-4).
- 282 13. Chaudhry A, Ikram A, Baig MA, Salman M, Ghafoor T, Zakir H, et al. Mortality analysis  
283 of COVID-19 confirmed cases in Pakistan. medRxiv [preprint]. 2020 Jan 1. doi:  
284 [10.1101/2020.06.07.20121939](https://doi.org/10.1101/2020.06.07.20121939).
- 285 14. Rahim F, Amin S, Noor M, Bahadur S, Gul H, Mahmood A, et al. Mortality of patients  
286 with severe COVID-19 in the Intensive Care Unit: An observational study from a major COVID-  
287 19 receiving hospital. Cureus. 2020;12(10): e10906. doi: [10.7759/cureus.10906](https://doi.org/10.7759/cureus.10906).

- 288 15. Banerjee J, Canamar CP, Voyageur C, Tangraphaphorn S, Lemus A, Coffey C, et al.  
289 Mortality and Readmission Rates Among Patients With COVID-19 After Discharge From Acute  
290 Care Setting With Supplemental Oxygen. *JAMA Netw Open*. 2021;4(4):e213990. doi:  
291 10.1001/jamanetworkopen.2021.3990.
- 292 16. Booth A, Reed AB, Ponzio S, Yassaee A, Aral M, Plans D, et al. Population risk factors  
293 for severe disease and mortality in COVID-19: A global systematic review and meta-analysis.  
294 *PLOS ONE*. 2021;16(3): e0247461. doi: [10.1371/journal.pone.0247461](https://doi.org/10.1371/journal.pone.0247461).
- 295 17. Az A, Sogut O, Akdemir T, Ergenc H, Dogan Y, Cakirca M. Impacts of demographic and  
296 clinical characteristics on disease severity and mortality in patients with confirmed COVID-19.  
297 *Int J Gen Med*. 2021;14: 2989-3000. doi: [10.2147/IJGM.S317350](https://doi.org/10.2147/IJGM.S317350).
- 298 18. UIHaq Z, Shahzad M, Khattak MI, Fazid S, Ullah N, Shireen A, et al. Clinical  
299 Characteristics, Mortality and Associated risk factors in COVID-19 patients reported in ten  
300 major hospitals of Khyber Pakhtunkhwa, Pakistan. *J Ayub Med Coll Abbottabad JAMC*.  
301 2020;32 [Suppl: 1] (4): S633-S639.
- 302 19. Nasir N, Habib K, Khanum I, Khan N, Muhammad ZA, Mahmood SF. Predictors of  
303 severity and mortality of COVID-19 at a tertiary care center in a Lower-middle income country.  
304 *Authorea Preprints*. 2020 Oct 1.
- 305 20. Adnan D, Deshmukh AA, Khan SR, Rempert T, Dhana K, Mahdavinia M, et al. S1358  
306 gastrointestinal symptoms predict the outcomes of COVID-19 infection. *Am J Gastroenterol*.  
307 2020;115(1): S685-S686. doi: [10.14309/01.ajg.0000707480.23480.66](https://doi.org/10.14309/01.ajg.0000707480.23480.66).

- 308 21. Ramachandran P, Onukogu I, Ghanta S, Gajendran M, Perisetti A, Goyal H, et al.  
309 Gastrointestinal symptoms and outcomes in hospitalized coronavirus disease 2019 patients. Dig  
310 Dis. 2020;38(5): 373-379.
- 311 22. Sanyaolu A, Okorie C, Marinkovic A, Patidar R, Younis K, Desai P, et al. Comorbidity  
312 and its impact on patients with COVID-19. SN Compr Clin Med. 2020;2(8): 1069-1076. doi:  
313 [10.1007/s42399-020-00363-4](https://doi.org/10.1007/s42399-020-00363-4).
- 314 23. Ali I. Syndemics at play: Chronic kidney disease, diabetes and COVID-19 in Pakistan.  
315 Ann Med. 2021;53(1): 581-586. doi: [10.1080/07853890.2021.1910335](https://doi.org/10.1080/07853890.2021.1910335).
- 316 24. Shoaib N, Noureen N, Munir R, Shah FA, Ishtiaq N, Jamil N, et al. COVID-19 severity:  
317 Studying the clinical and demographic risk factors for adverse outcomes. PLOS ONE.  
318 2021;16(8): e0255999. doi: [10.1371/journal.pone.0255999](https://doi.org/10.1371/journal.pone.0255999).

**(A) Fever**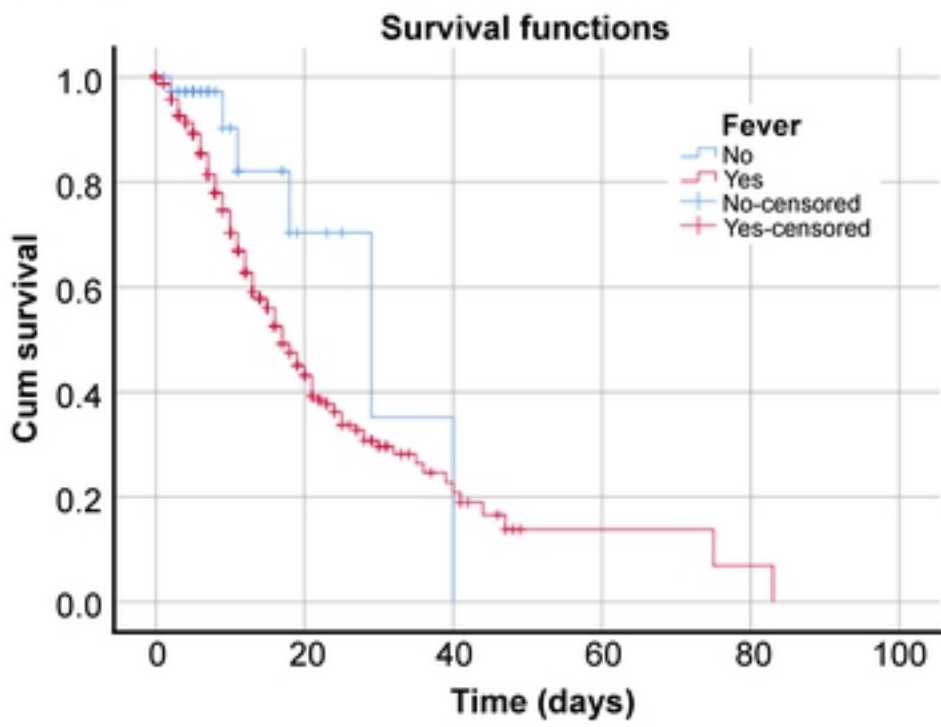

| Fever | Number at risk |    |    |    |    |     |
|-------|----------------|----|----|----|----|-----|
|       | 0              | 20 | 40 | 60 | 80 | 100 |
| No    | 39             | 4  | 0  | 0  | 0  | 0   |
| Yes   | 1048           | 65 | 11 | 11 | 1  | 0   |

**(B) Shortness of breath**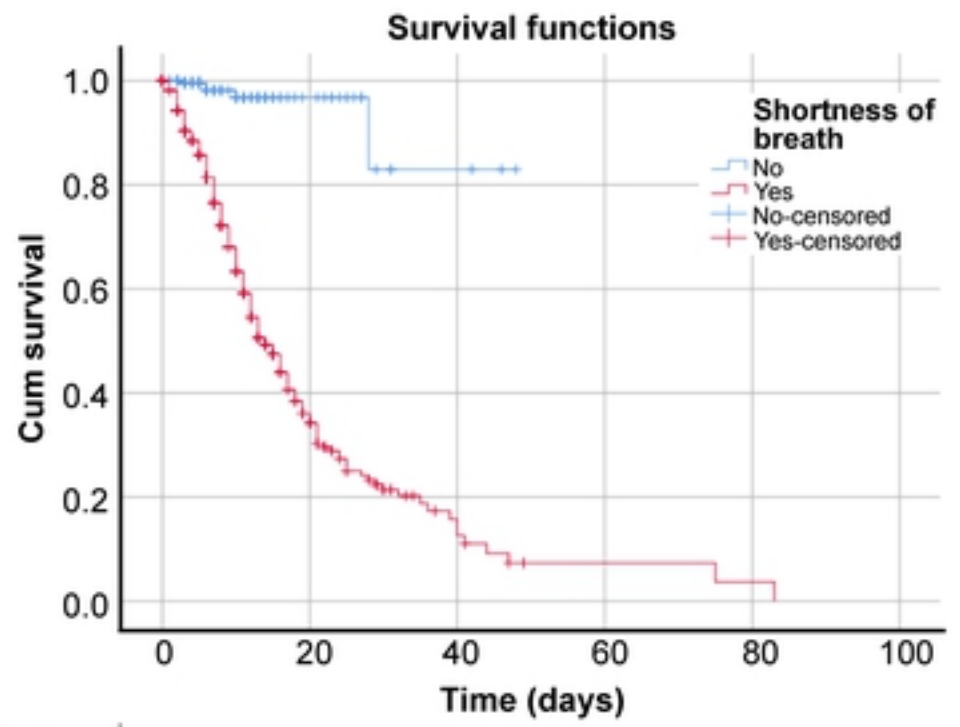

| Shortness of breath | Number at risk |    |    |    |    |     |
|---------------------|----------------|----|----|----|----|-----|
|                     | 0              | 20 | 40 | 60 | 80 | 100 |
| No                  | 297            | 17 | 3  | 0  | 0  | 0   |
| Yes                 | 790            | 52 | 8  | 2  | 1  | 0   |

**(C) Ischemic heart disease**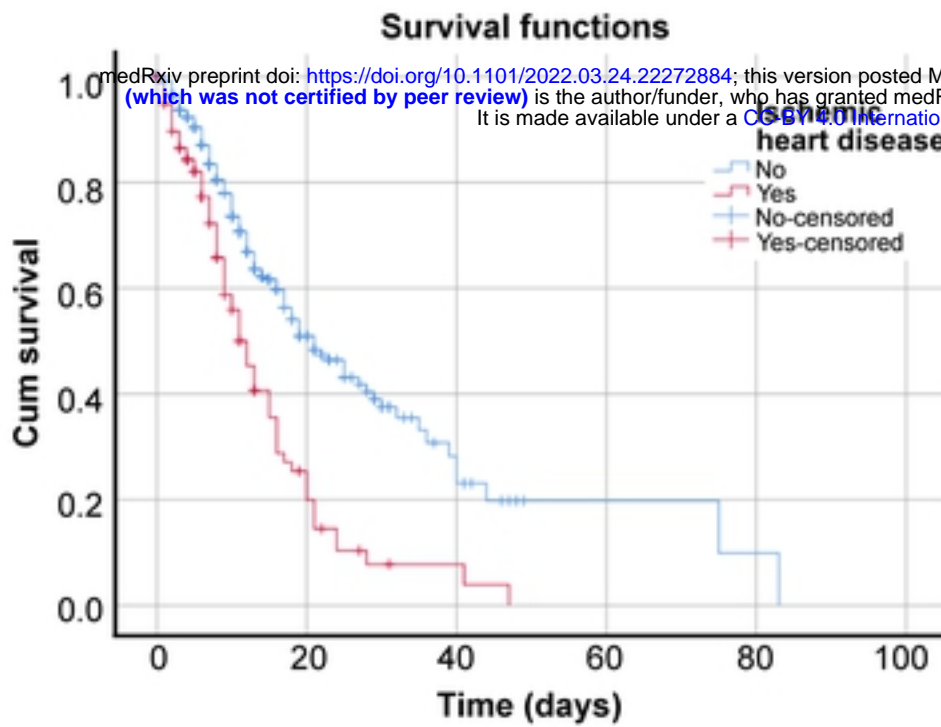

| Ischemic heart disease | Number at risk |    |    |    |    |     |
|------------------------|----------------|----|----|----|----|-----|
|                        | 0              | 20 | 40 | 60 | 80 | 100 |
| No                     | 989            | 58 | 9  | 2  | 1  | 0   |
| Yes                    | 98             | 11 | 2  | 0  | 0  | 0   |

**(D) Nausea & Vomiting**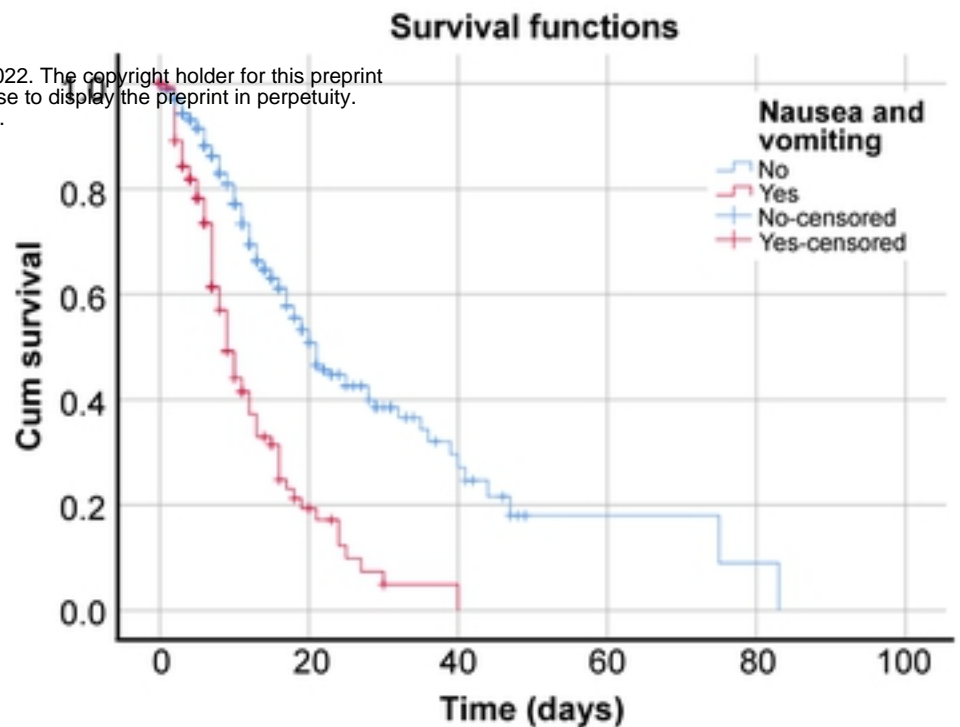

| Nausea & vomiting | Number at risk |    |    |    |    |     |
|-------------------|----------------|----|----|----|----|-----|
|                   | 0              | 20 | 40 | 60 | 80 | 100 |
| No                | 948            | 60 | 11 | 2  | 1  | 0   |
| Yes               | 139            | 9  | 0  | 0  | 0  | 0   |

**(E) Diarrhea**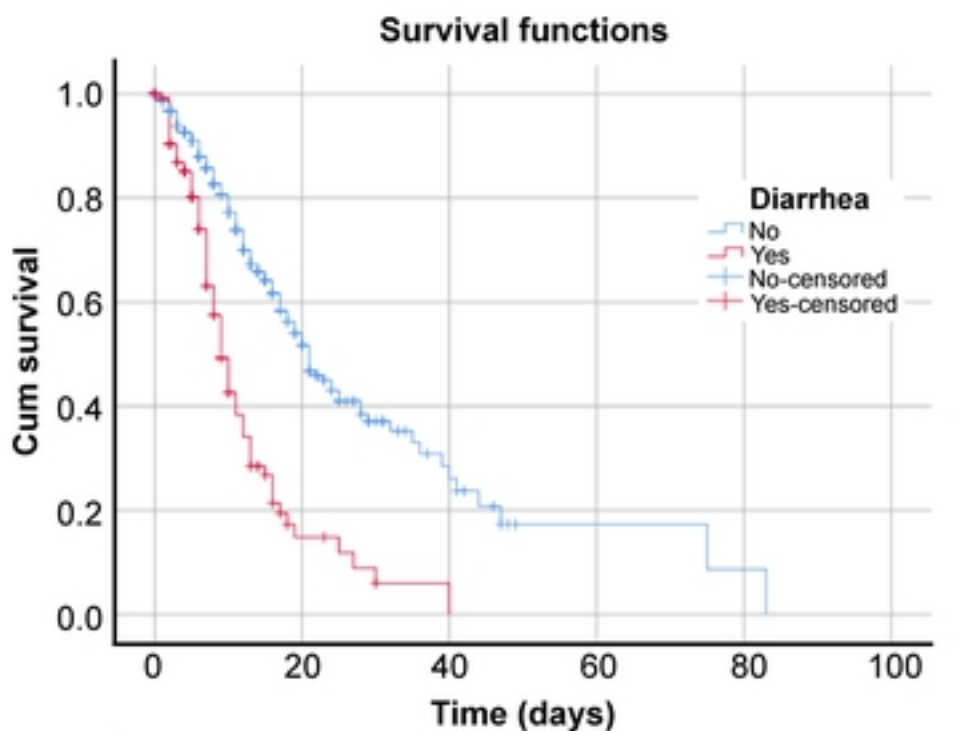

| Diarrhea | Number at risk |    |    |    |    |     |
|----------|----------------|----|----|----|----|-----|
|          | 0              | 20 | 40 | 60 | 80 | 100 |
| No       | 955            | 63 | 11 | 2  | 1  | 0   |
| Yes      | 132            | 6  | 0  | 0  | 0  | 0   |

**(F) Unit of admission**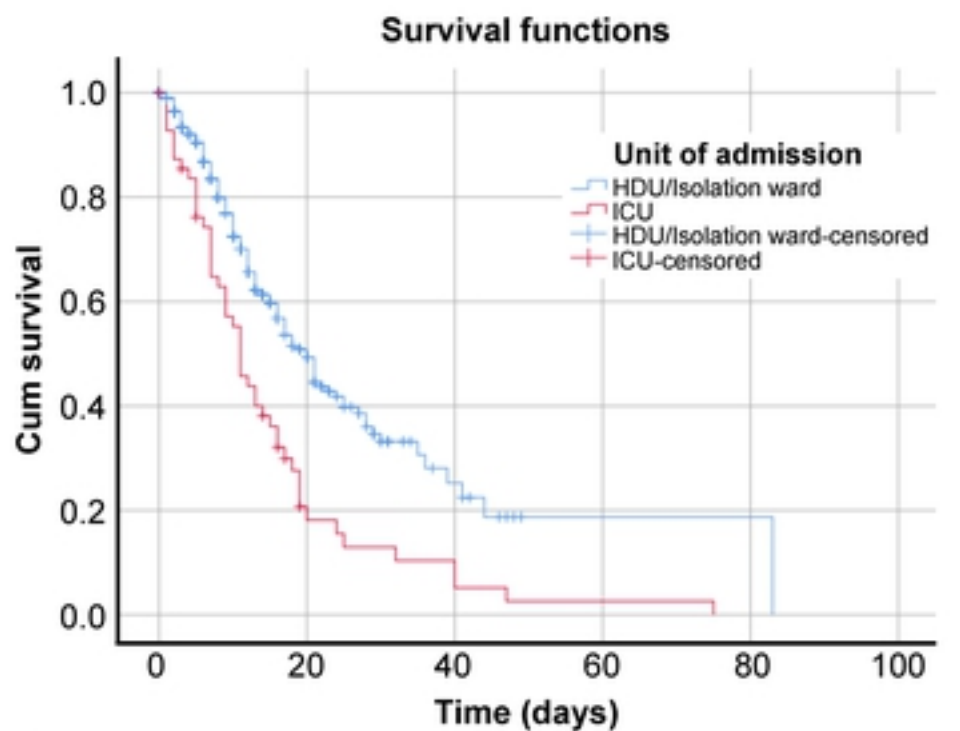

| Unit of admission    | Number at risk |    |    |    |    |     |
|----------------------|----------------|----|----|----|----|-----|
|                      | 0              | 20 | 40 | 60 | 80 | 100 |
| HDU / Isolation ward | 1031           | 62 | 9  | 1  | 1  | 0   |
| ICU                  | 56             | 7  | 3  | 1  | 0  | 0   |
